# Supplementary material
Source: publisher figshare collection journal article supplement (https://acs.figshare.com/ndownloader/files/3749404)
Supplement: Supplementary file 1 [file 3749404]

## Sheet: S-1 Sites
Table S-1. Sampling sites, setting, and core length.
Site name (abbreviation)	Setting	Latitude	Longitude	Distance from the outlet of Lake Geneva (km)	Core length (cm)
Gravière des Etournels (ETL)	Former quarry	5.9356	46.1319	23	98
La Morte (MTE)	Secondary channel	5.55405	45.7016	104	69
Crépieux (CPX)	Former quarry	4.91631	45.803	175	78/94*
Table Ronde (TBR)	Small embayment	4.79963	45.6108	197	123
Ile du Beurre (BRE)	Secondary channel	4.78207	45.4764	222	106/98*
Arras (ARS)	Off-channel basin	4.80731	45.1325	263	135
Lône de la Grange Ecrasée (GEC)	Secondary channel	4.65581	44.39	354	100
*two cores were collected at these sites

## Sheet: S-2 PCDDFs
Table S-2. PCDD and PCDF congeners measured in Rhone sediment cores.
Abbrev.	Acronym	Name
F1	2378-TetraCDF	2,3,7,8 tetrachloro-dibenzofuran
F2	12378-PentaCDF	1,2,3,7,8 pentachloro-dibenzofuran
F3	23478-PentaCDF	2,3,4,7,8 pentachloro-dibenzofuran
F4	123478-HexaCDF	1,2,3,4,7,8 hexachloro-dibenzofuran
F5	123678-HexaCDF	1,2,3,6,7,8 hexachloro-dibenzofuran
F6	123789-HexaCDF	1,2,3,7,8,9 hexachloro-dibenzofuran
F7	234678-HexaCDF	1,2,3,4,7,8 hexachloro-dibenzofuran
F8	1234678-HeptaCDF	1,2,3,4,6,7,8 heptachloro-dibenzofuran
F9	1234789-HeptaCDF	1,2,3,4,7,8,9 heptachloro-dibenzofuran
F10	OctaCDF	Octachloro-dibenzofuran
D1	2378-TetraCDD	2,3,7,8 tetrachloro-dibenzodioxin
D2	12378-PentaCDD	1,2,3,7,8 pentachloro-dibenzodioxin
D3	123478-HexaCDD	1,2,3,4,7,8 hexachloro-dibenzodioxin
D4	123678-HexaCDD	1,2,3,6,7,8 hexachloro-dibenzodioxin
D5	123789-HexaCDD	1,2,3,7,8,9 hexachloro-dibenzodioxin
D6	1234678-HeptaCDD	1,2,3,4,6,7,8 heptachloro-dibenzodioxin
D7	OctaCDD	Octachloro-dibenzodioxin

## Sheet: S-3 Data
Table S-3. Concentrations in pg g-1 dry weight of PCDF and PCDD congeners and percent dry mass, organic carbon, clay, silt, and sand in sediment core samples from the Rhone River.
"na" = not analyzed. All congener concentrations and summations are rounded to 3 significant figures or fewer.
Sample	Depth (cm)	Date	% Dry mass	% Organic Carbon	% Clay	% Silt	% Sand	2378-TetraCDF	12378-PentaCDF	23478-PentaCDF	123478-HexaCDF	123678-HexaCDF	123789-HexaCDF	234678-HexaCDF	1234678-HeptaCDF	1234789-HeptaCDF	OctaCDF	S PCDF	2378-TetraCDD	12378-PentaCDD	123478-HexaCDD	123678-HexaCDD	123789-HexaCDD	1234678-HeptaCDD	OctaCDD	S PCDD	S PCDD-PCDF
ETL 10-02	0-1 cm	2009.67	54.6	0.0193714	0.0425366	0.733051	0.224412	0.6	0.42	0.4	0.47	0.29	< 0.17	0.59	1.75	0.18	3.04	7.74	< 0.08	0.13	< 0.21	0.34	0.25	6.57	41	48.29	56.03
ETL 10-02	2-3 cm	2008.49	57.6	0.0124	0.0383318	0.732975	0.228447	0.55	0.4	0.39	0.4	< 0.22	< 0.22	0.29	1.12	< 0.2	2.18	5.33	< 0.1	< 0.13	< 0.26	< 0.26	< 0.26	4.67	32.6	37.27	42.6
ETL 10-02	4-5 cm	2007.09	65.9	0.00955109	0.0308279	0.639358	0.329814	0.45	0.37	0.33	0.32	0.18	< 0.15	0.28	1.08	< 0.14	2.03	5.04	< 0.07	0.09	< 0.18	0.29	0.2	4.15	26.7	31.43	36.47
ETL 10-02	6-7 cm	2006.02	66.3	0.00983605	0.0362906	0.683879	0.279831	0.43	0.37	0.35	0.34	0.21	< 0.14	0.32	1.45	0.17	2.7	6.34	< 0.06	0.09	< 0.17	0.28	0.18	5.06	33.6	39.21	45.55
ETL 10-02	8-9 cm	2004.97	63.8	0.0104525	0.0405135	0.753047	0.20644	0.46	0.37	0.47	0.32	0.17	< 0.17	0.26	1.15	< 0.16	2.13	5.33	< 0.08	< 0.1	< 0.21	0.21	< 0.21	4.2	30.7	35.11	40.44
ETL 10-02	10-11 cm	2004.46	65.5	na	0.034388	0.642828	0.322784	0.7	0.36	0.34	0.47	0.25	< 0.21	0.38	1.4	< 0.2	2.65	6.55	< 0.09	< 0.13	< 0.25	0.34	0.27	5.5	34	40.11	46.66
ETL 10-02	12-13 cm	2003.35	66.5	0.0105881	0.0409685	0.71575	0.243281	0.62	0.47	0.53	0.67	0.32	< 0.14	0.5	2.11	0.22	3.02	8.46	< 0.07	0.12	< 0.17	0.34	0.24	6.11	34.9	41.71	50.17
ETL 10-02	14-15 cm	2002.25	66.7	0.00973249	0.037042	0.693039	0.269919	0.66	0.34	0.53	0.57	0.42	< 0.15	0.85	4.42	0.41	4.67	12.87	< 0.07	0.13	< 0.18	0.39	0.3	7.14	42.7	50.66	63.53
ETL 10-02	16-17 cm	2001.17	65.3	0.00960302	0.0384313	0.711034	0.250535	0.7	0.35	0.49	0.55	0.36	< 0.13	0.53	2.2	0.29	3.99	9.46	< 0.06	0.13	< 0.16	0.42	0.36	7.07	47.4	55.38	64.84
ETL 10-02	18-19 cm	2000.16	62.2	0.00962889	0.0492989	0.771437	0.179265	0.79	0.34	0.58	0.54	0.35	< 0.14	0.56	2.31	0.34	4.71	10.52	< 0.06	0.15	< 0.17	0.5	0.36	7.89	49.8	58.7	69.22
ETL 10-02	20-21 cm	1999.23	60.2	0.0101217	0.055808	0.792849	0.151343	0.74	0.49	0.54	0.64	0.37	< 0.22	0.59	2.55	0.42	5.51	11.85	< 0.1	< 0.13	< 0.26	0.45	0.37	8.69	57.9	67.41	79.26
ETL 10-02	22-23 cm	1998.37	60.39	0.00991902	0.0587213	0.825021	0.116258	0.67	0.46	0.57	0.75	0.47	< 0.2	0.72	2.61	0.42	5.09	11.76	< 0.09	0.14	< 0.25	0.44	0.27	8.52	62.2	71.57	83.33
ETL 10-02	24-25 cm	1997.44	58.6	0.00736617	0.0603635	0.814646	0.124991	0.94	0.5	0.75	0.65	0.45	< 0.19	0.76	3.27	0.44	5	12.76	< 0.09	0.21	< 0.23	0.8	0.58	11.9	69.7	83.19	95.95
ETL 10-02	26-27 cm	1996.44	69.3	0.00926237	0.0397511	0.694608	0.265641	0.87	0.51	0.8	0.93	0.73	< 0.16	1.31	5.29	0.78	6.62	17.84	< 0.07	0.27	0.43	1.5	0.94	26.6	96.9	126.64	144.48
ETL 10-02	28-29 cm	1995.29	70.8	0.00882497	0.0419864	0.718291	0.239723	0.93	0.58	1	1.19	0.92	< 0.11	1.82	6.4	1.24	9.62	23.7	< 0.05	0.36	0.42	1.76	1.07	28.5	108	140.11	163.81
ETL 10-02	30-31 cm	1994.11	66.8	0.00907584	0.0605979	0.801301	0.138101	0.9	0.54	0.9	0.98	0.74	< 0.13	1.23	3.74	0.57	6.71	16.31	< 0.06	0.3	0.45	1.4	0.91	23	153	179.06	195.37
ETL 10-02	32-33 cm	1993.03	67.5	0.0122375	0.0517352	0.752221	0.195947	1.46	1.56	2.38	2.79	2.44	< 0.15	4.55	14.3	2.63	21.2	53.31	0.08	1.54	1.57	5.4	3.37	68.5	330	410.46	463.77
ETL 10-02	44-45 cm	1986.3	70.1	0.0102758	0.0602582	0.767211	0.172531	1.25	0.76	1.17	1.32	1.02	< 0.12	1.77	6.25	0.98	9.36	23.88	0.12	0.4	0.49	1.55	0.85	28.4	155	186.81	210.69
ETL 10-02	46-47 cm	1985.95	70.9	0.00766736	0.0438899	0.644826	0.311201	2.75	0.98	1.3	1.44	0.98	< 0.11	1.64	7.06	0.89	9.57	26.61	< 0.05	0.3	0.49	1.24	0.74	26.7	160	189.47	216.08
ETL 10-02	48-49 cm	1985.58	73.8	0.0068845	0.0613612	0.657499	0.281139	0.98	0.46	0.62	0.94	0.63	< 0.1	1.11	3.68	0.49	6.8	15.71	< 0.04	0.19	0.4	0.93	0.55	22.7	154	178.77	194.48
ETL 10-02	50-51 cm	1985.2	73.1	0.00738917	0.0594702	0.654773	0.285659	0.91	0.73	1.07	1.58	1.19	< 0.11	2.26	10	1.22	13.4	32.36	0.08	0.54	0.75	1.57	0.84	28.3	167	199.08	231.44
ETL 10-02	52-53 cm	1984.82	75.9	0.0046877	0.038462	0.458201	0.503337	0.45	0.29	0.33	0.56	0.39	< 0.09	0.77	3.59	0.46	4.88	11.72	< 0.04	0.15	0.49	0.26	0.3	9.38	44.4	54.98	66.7
ETL 10-02	54-55 cm	1984.43	75.2	0.00504251	0.0471381	0.621288	0.331573	0.16	0.1	0.11	0.14	< 0.09	< 0.09	0.12	0.53	< 0.08	< 0.7	1.16	< 0.04	< 0.05	< 0.11	0.11	< 0.11	1.86	< 11,4	1.97	3.13
ETL 10-02	56-57 cm	1982	74.7	0.00673401	0.031159	0.489241	0.479513	< 0.08	< 0.11	< 0.11	< 0.1	< 0.1	< 0.1	< 0.1	0.29	< 0.09	< 0.77	0.29	< 0.04	< 0.06	< 0.11	< 0.11	< 0.11	0.93	< 12,5	0.93	1.22
ETL 10-02	58-59 cm	1982	77	0.00569341	0.0342736	0.485338	0.480235	< 0.07	< 0.1	< 0.1	< 0.09	< 0.09	< 0.09	< 0.09	0.18	< 0.09	< 0.73	0.18	< 0.04	< 0.05	< 0.11	< 0.11	< 0.11	0.94	< 11,9	0.94	1.12
ETL 10-02	60-61 cm	1982	75.72	0.00334683	0.0377035	0.548565	0.413732	0.09	< 0.1	< 0.1	< 0.09	< 0.09	< 0.09	0.1	0.49	0.13	1.16	1.97	< 0.04	< 0.06	< 0.11	< 0.11	< 0.11	1.78	12.1	13.88	15.85
ETL 10-02	62-63 cm	1982	74.81	0.00349794	0.0374299	0.512617	0.449954	< 0.08	< 0.1	< 0.1	< 0.09	< 0.09	< 0.09	< 0.09	0.29	< 0.09	< 0.76	0.29	< 0.04	< 0.06	< 0.11	< 0.11	< 0.11	1.06	19.4	20.46	20.75
ETL 10-02	64-65 cm	1981.6	74.15	0.00475037	0.0484802	0.555607	0.395837	0.44	0.32	0.43	0.49	0.3	< 0.16	0.48	2.2	0.26	2.52	7.44	< 0.07	0.16	< 0.19	0.4	0.28	5.81	32.5	39.15	46.59
ETL 10-02	66-67 cm	1981.2	76.1	0.00494648	0.105732	0.745866	0.148402	1.35	0.32	0.6	0.38	0.15	< 0.12	0.2	0.7	< 0.12	< 1	3.7	< 0.06	< 0.07	< 0.15	0.15	< 0.15	2.9	< 16,2	3.05	6.75
ETL 10-02	68-69 cm	1980.79	74.96	0.00661643	0.0650737	0.661634	0.273233	0.25	0.13	0.18	0.14	< 0.11	< 0.11	0.13	0.5	< 0.11	< 0.91	1.33	< 0.05	< 0.07	< 0.14	< 0.14	< 0.14	1.99	< 14,8	1.99	3.32
ETL 10-02	70-71 cm	1980.39	75.66	0.00513214	0.0624561	0.706955	0.230588	0.19	0.13	0.15	0.17	< 0.11	< 0.11	0.16	0.64	< 0.11	< 0.91	1.44	< 0.05	< 0.07	< 0.14	< 0.14	< 0.14	1.67	< 14,8	1.67	3.11
ETL 10-02	72-73 cm	1980	77.4	0.00726414	0.0357651	0.474665	0.48957	< 0.12	< 0.17	< 0.17	< 0.15	< 0.15	< 0.15	< 0.15	0.23	< 0.14	< 1,22	0.23	< 0.07	< 0.09	< 0.18	< 0.18	< 0.18	< 1,29	< 19,8	0	0.23
ETL 10-02	74-75 cm	1979.64	75.97	0.0035672	0.0245132	0.3358	0.639572	< 0.07	< 0.1	< 0.1	< 0.09	< 0.09	< 0.09	< 0.09	< 0.12	< 0.08	< 0.71	0	< 0.04	< 0.05	< 0.11	< 0.11	< 0.11	< 0.76	< 11,6	0	0
MTE 08-03	0-1 cm	2007.97	41.2	0.0344	na	na	na	1.07	0.71	1.22	1.44	1.14	< 0.16	1.95	8.07	1.11	9.87	26.58	0.08	0.28	0.32	0.93	0.64	15.5	97.3	115.05	141.63
MTE 08-03	2-3 cm	2006.29	39.5	0.0373	0.0444836	0.753288	0.202137	1.01	0.4	0.71	0.66	0.38	< 0.23	0.57	3.65	< 0.47	17.2	24.58	< 0.10	0.17	< 0.28	0.82	0.52	31.9	284	317.41	341.99
MTE 08-03	4-5 cm	2004.59	42.3	0.0333	0.0447119	0.739658	0.21563	1.14	0.53	0.63	0.68	0.42	< 0.17	0.76	3.06	0.48	8.07	15.77	< 0.08	0.21	0.26	0.75	0.52	17.4	129	148.14	163.91
MTE 08-03	6-7 cm	2002.87	40.6	0.0334	0.045878	0.728945	0.225177	1.06	0.5	0.86	0.84	0.49	< 0.20	0.77	6.58	0.29	8.6	19.99	< 0.09	0.24	0.32	0.86	0.55	17.2	126	145.17	165.16
MTE 08-03	8-9 cm	2001.17	41.2	0.0316	0.0490512	0.716387	0.234562	1.35	0.53	0.87	0.97	0.65	< 0.14	0.8	4.7	0.64	10.5	21.01	0.11	0.31	0.34	1.14	0.78	22	144	168.68	189.69
MTE 08-03	10-11 cm	1999.38	44.5	0.0338	0.0515522	0.719005	0.229443	1.44	0.65	0.95	0.94	0.66	< 0.16	0.76	4.64	0.63	10.3	20.97	< 0.07	0.34	0.4	1.24	0.83	24.4	163	190.21	211.18
MTE 08-03	12-13 cm	1997.57	42.8	0.0369	0.0487166	0.72126	0.230024	1.47	0.64	1	1.05	0.76	< 0.16	0.86	4.86	0.7	11.7	23.04	0.11	0.31	0.48	1.52	1.05	30.3	183	216.77	239.81
MTE 08-03	14-15 cm	1995.75	44.4	0.0327	0.0504729	0.725042	0.224485	1.44	0.69	1.01	1.02	0.76	< 0.13	0.91	5.32	0.72	14	25.87	0.11	0.33	0.49	1.51	0.98	29.2	195	227.62	253.49
MTE 08-03	16-17 cm	1993.85	47.2	0.0319	0.0679198	0.756581	0.175499	1.52	0.75	1.07	1.1	0.82	< 0.16	1.02	5.55	0.85	13.4	26.08	0.09	0.34	0.47	1.69	1.11	33.1	223	259.8	285.88
MTE 08-03	18-19 cm	1991.84	49.3	0.027	0.0663989	0.770902	0.162699	1.86	0.75	1.02	1.09	0.91	< 0.11	1.05	7.18	1.04	21.7	36.6	0.11	0.4	0.55	2.23	1.23	55.3	459	518.82	555.42
MTE 08-03	20-21 cm	1989.92	43.2	0.0479	na	na	na	1.8	0.85	1.34	1.1	0.96	< 0.13	1	5.31	0.83	14.5	27.69	0.09	0.46	0.47	1.85	1.06	40.7	290	334.63	362.32
MTE 08-03	21-22 cm	1989.35	11.2	0.0545	na	na	na	1.79	0.84	1.12	1.34	1.02	< 0.51	0.86	4.98	0.87	14.1	26.92	< 0.23	0.38	< 0.61	1.75	1.07	40.8	309	353	379.92
MTE 08-03	24-25 cm	1987.45	44.4	0.0541	0.058964	0.734859	0.206177	1.92	0.96	1.4	1.36	1.15	< 0.14	1	7.91	1.2	28.2	45.1	0.12	0.46	0.7	3.33	1.68	75.9	545	627.19	672.29
MTE 08-03	26-27 cm	1986.06	48.7	0.0477	0.0642975	0.729424	0.206278	2.28	1.18	1.57	1.76	1.21	0.11	1.6	9.33	1.35	31.8	52.19	0.14	0.6	0.99	3.92	2.18	113	915	1040	1090
MTE 08-03	28-29 cm	1985.15	49.8	0.08	0.0624788	0.730533	0.206988	2.25	1.01	1.64	2.02	1.24	0.15	1.51	14.4	2.37	82	108.59	0.15	0.65	0.92	5.73	2.19	182	1590	1780	1890
MTE 08-03	30-31 cm	1984.16	57.1	0.0257	0.0864133	0.772165	0.141422	2.75	1.47	2.06	2.31	1.54	0.12	1.72	10.7	1.29	38.3	62.26	0.2	0.72	1	3.59	2.02	105	878	990.53	1050
MTE 08-03	32-33 cm	1983.22	45	0.0652	0.0824838	0.724552	0.192964	2.8	1.68	2.3	2.17	1.32	0.13	1.41	11.4	1.34	55.8	80.35	0.2	0.72	0.96	4.79	2.33	123	942	1070	1150.35
MTE 08-03	34-35 cm	1982.34	50.9	0.0451	0.0784453	0.705189	0.216365	2.78	1.12	1.73	2.01	1.32	< 0.11	1.64	22.1	2.18	162	196.88	0.24	0.82	1.26	9.42	3.08	317	2540	2870	3070
MTE 08-03	36-37 cm	1981.31	59.7	0.0435	0.0716974	0.65852	0.269782	2.89	0.98	1.4	2.17	1.43	0.11	1.85	45.3	3.31	398	457.44	0.23	0.69	1.42	21.9	4.28	855	3480	4360	4820
MTE 08-03	38-39 cm	1980.38	41.9	0.0664	0.0590405	0.660277	0.280683	3.88	1.27	1.79	2.11	1.31	< 0.18	1.61	10	1.07	39.3	62.34	0.33	0.7	0.78	3.84	1.97	94.3	689	790.92	853.26
MTE 08-03	40-41 cm	1979.43	60.8	0.0106	0.074999	0.72724	0.197761	3.51	1.13	1.84	2.36	1.47	0.13	2.17	18.9	1.92	120	153.43	0.26	0.81	0.97	5.65	2.33	213	982	1200	1350
MTE 08-03	42-43 cm	1978.34	56.7	0.0623	0.0799053	0.754348	0.165746	3.71	1.19	1.81	2.6	1.6	0.14	2.43	19.9	2.2	109	144.58	0.32	0.86	1.08	5.97	2.43	211	989	1210	1360
MTE 08-03	44-45 cm	1977.26	60.7	0.0263	0.0816901	0.80472	0.11359	5.17	2.29	3.15	5.37	3.6	0.32	5.67	32.9	3.7	83.4	145.57	0.61	2.03	2.1	5.72	3.79	144	749	907.25	1050
MTE 08-03	46-47 cm	1976.13	61.8	0.023	0.0744889	0.762468	0.163043	3.56	1.32	2.17	3.01	2	0.19	3.22	27.8	2.71	164	209.98	0.35	1.53	1.63	7.93	3.63	275	1520	1810.07	2020.05
MTE 08-03	48-49 cm	1974.96	64.4	0.024	0.0760695	0.741862	0.182069	4.46	1.63	2.15	3.6	2.28	0.2	3.53	23.2	2.56	63.4	107.01	0.37	1.23	1.37	5.01	2.77	135	843	988.75	1100
MTE 08-03	50-51 cm	1973.82	59.4	0.0335	0.090966	0.755644	0.15339	2.95	1.36	2.39	2.88	1.83	0.15	2.56	18.8	1.85	37.1	71.87	0.21	1.06	1.06	3.77	1.78	93.1	544	644.98	716.85
MTE 08-03	52-53 cm	1972.73	58.3	0.0367	0.110651	0.785455	0.103894	4.98	1.33	1.88	2.56	1.35	0.13	1.71	10	1.2	23.5	48.64	0.28	0.73	0.78	3.1	1.56	77.2	513	596.65	645.29
MTE 08-03	54-55 cm	1971.65	59.1	0.0248	0.126281	0.805886	0.0678327	6.29	1.61	2.59	3.4	1.45	0.16	1.94	11.8	1.45	26.8	57.49	0.44	1.13	0.74	2.42	1.29	63.9	427	496.92	554.41
MTE 08-03	56-57 cm	1970.52	63.2	0.0193	0.125965	0.80297	0.071065	5.7	1.69	2.15	3.64	1.61	0.14	2.04	12	1.4	24.9	55.27	0.54	1.51	0.72	2.41	1.52	49.7	334	390.4	445.67
MTE 08-03	58-59 cm	1969.33	65.6	0.0166	0.121856	0.795061	0.0830828	4.99	1.66	2.33	3.81	1.5	< 0.13	1.83	11.6	1.21	25.7	54.63	0.59	0.91	0.68	2.18	1.21	46	304	355.57	410.2
MTE 08-03	60-61 cm	1968.12	65.3	0.0199	0.111181	0.784592	0.104227	4.67	1.38	1.99	3.64	1.38	< 0.12	1.75	12.5	1.46	28.8	57.57	0.49	0.94	0.68	2.36	1.36	55	381	441.83	499.4
MTE 08-03	62-63 cm	1966.92	63.5	0.0242	0.121861	0.780572	0.0975674	6.24	2.09	2.34	4.68	1.8	0.17	2.13	15	1.78	37.9	74.13	0.94	1.19	0.85	2.97	1.63	65	459	531.58	605.71
MTE 08-03	64-65 cm	1965.72	63.7	0.0298	0.134982	0.781986	0.0830319	4.44	1.31	1.87	3.34	1.21	0.12	1.45	10.7	1.18	23.8	49.42	0.54	0.76	0.68	2.21	1.23	50.3	335	390.72	440.14
MTE 08-03	66-67 cm	1964.57	61.6	0.0124	0.105874	0.796114	0.0980125	5.16	1.6	1.87	3.11	1.38	0.13	1.58	13.7	1.7	40.9	71.13	0.48	1.48	0.76	2.72	1.41	75.8	506	588.65	659.78
MTE 08-03	68-69 cm	1963.44	60.9	0.0257	na	na	na	3.93	1.07	1.43	2.37	0.89	< 0.13	0.99	8.55	1.2	23.9	44.33	0.25	0.45	0.43	1.67	0.91	40.7	272	316.41	360.74
CPX 08-01	0-1 cm	2008.2	48.6	0.0204	na	na	na	1.97	0.44	1.44	0.89	0.57	< 0.17	1.08	3.76	0.53	7.84	18.52	0.09	0.22	0.3	0.76	0.6	15.3	87.2	104.47	122.99
CPX 08-01	2-3 cm	2007.43	48.4	0.022	0.0619925	0.772848	0.164929	2.6	0.81	2.26	1.2	0.65	< 0.18	1.42	3.71	0.54	14.2	27.39	< 0.08	0.27	0.36	0.94	0.61	19.5	143	164.68	192.07
CPX 08-01	4-5 cm	2006.65	52.6	0.0215	0.0705635	0.804362	0.124886	3.61	0.79	2.39	1.27	0.79	< 0.20	1.82	5.44	0.86	15.5	32.47	0.12	0.31	0.38	1.04	0.74	19.3	135	156.89	189.36
CPX 08-01	6-7 cm	2005.88	50.9	0.0182	0.074959	0.804592	0.120391	2.75	0.67	2.16	1.24	0.79	< 0.20	2.08	5.97	1.02	15.4	32.08	0.1	0.28	0.34	1.06	0.72	20.2	119	141.7	173.78
CPX 08-01	8-9 cm	2005.1	55.6	0.0196	0.0678583	0.79756	0.134582	2.82	0.83	2.07	1.22	0.86	< 0.14	2.08	5.84	1.04	17.8	34.56	0.11	0.27	0.46	1.23	0.89	22.8	118	143.76	178.32
CPX 08-01	10-11 cm	2004.27	50.7	0.0188	0.0549276	0.73789	0.207182	4.32	0.96	3.15	1.46	0.97	< 0.12	2.43	6.11	1.13	15.7	36.23	0.16	0.3	0.42	1.08	0.85	23.2	133	159.01	195.24
CPX 08-01	12-13 cm	2003.3	56.5	0.00922	0.0476079	0.656722	0.29562	3.1	0.69	2.18	1.15	0.73	< 0.10	1.84	5.05	0.93	12.6	28.27	0.12	< 0.06	0.31	0.95	0.67	23.4	186	211.45	239.72
CPX 08-01	14-15 cm	2002.34	59.6	0.0145	0.0508229	0.647581	0.301464	2.65	0.58	1.63	0.93	0.64	< 0.08	1.49	4.36	0.81	10.5	23.59	0.09	0.2	0.3	0.87	0.57	18.2	119	139.23	162.82
CPX 08-01	16-17 cm	2001.37	63.4	0.0138	0.0554816	0.706231	0.238163	1.43	0.39	0.88	0.66	0.42	< 0.08	0.91	3.28	0.6	9.19	17.76	0.08	0.2	0.23	0.83	0.51	17.8	116	135.65	153.41
CPX 08-01	18-19 cm	2000.4	56.7	0.0192	0.0626346	0.789127	0.148196	2.13	0.65	1.4	1.13	0.74	0.28	1.56	6.3	1.18	19.2	34.57	0.11	0.3	0.42	1.37	0.79	28.7	203	234.69	269.26
CPX 08-01	20-21 cm	2000.31	58.6	0.0151	0.0652963	0.802555	0.132149	1.88	0.62	1.43	1.01	0.7	< 0.10	1.37	4.59	0.81	11.2	23.61	< 0.05	0.32	0.34	0.97	0.7	21.6	147	170.93	194.54
CPX 08-01	22-23 cm	1999.88	63	0.0141	0.0714435	0.792065	0.136492	1.4	0.48	1.03	0.89	0.61	< 0.08	1.11	4.05	0.76	10.5	20.83	0.08	0.25	0.29	0.89	0.69	18.2	117	137.4	158.23
CPX 08-01	24-25 cm	1999.45	59.7	0.0161	0.0773584	0.803157	0.119485	1.6	0.59	1.2	1.03	0.73	< 0.09	1.44	4.9	0.83	11.5	23.82	0.15	0.35	0.38	0.96	0.8	19.8	124	146.44	170.26
CPX 08-01	26-27 cm	1999.02	59.1	0.016	0.0678031	0.770806	0.16139	2.32	0.67	1.78	1.15	0.83	< 0.08	1.77	6.05	1.02	16.1	31.69	0.07	0.27	0.4	1.07	0.86	22.8	148	173.47	205.16
CPX 08-01	28-29 cm	1998.59	57.1	0.0181	0.0591532	0.712877	0.227883	2.38	0.71	1.55	1.12	0.74	< 0.1	1.48	5.29	0.89	13.4	27.56	0.11	0.3	0.48	1.24	0.91	32.5	183	218.54	246.1
CPX 08-01	30-31 cm	1998.16	57.6	0.0188	0.0629833	0.742995	0.193935	2.17	0.7	1.75	1.36	0.78	< 0.08	1.5	5.56	0.86	13.5	28.18	0.1	0.31	0.43	1.33	0.99	25.1	158	186.26	214.44
CPX 08-01	32-33 cm	1997.73	56.3	0.0154	0.071223	0.793706	0.135071	2.86	0.8	1.79	1.35	0.99	< 0.1	1.8	6.94	1.03	18.7	36.26	0.08	0.32	0.5	1.43	1.07	32.2	208	243.6	279.86
CPX 08-01	34-35 cm	1997.3	56.8	0.0162	0.0831309	0.812695	0.104174	2.97	0.85	2.14	1.56	0.99	< 0.08	1.56	7.72	1.02	25.2	44.01	0.09	0.43	0.57	1.71	1.25	38.1	258	300.15	344.16
CPX 08-01	36-37 cm	1996.88	63	0.0137	0.0895071	0.801647	0.108846	2.69	0.54	1.9	1.42	0.94	< 0.10	1.56	7.66	1	23.8	41.51	0.12	0.42	0.55	1.74	1.26	37.8	282	323.89	365.4
CPX 08-01	38-39 cm	1996.69	57.6	0.0147	0.0853959	0.775191	0.139413	3.13	0.98	2.02	1.68	1.1	< 0.11	1.79	9.08	1.21	37.3	58.29	0.19	0.4	0.58	1.9	1.39	49.9	389	443.36	501.65
CPX 08-01	40-41 cm	1996.5	65.1	0.0136	0.0857724	0.773015	0.141213	1.71	0.69	1.35	1.17	0.75	< 0.09	1.1	6.59	0.74	19	33.1	0.11	0.33	0.47	1.43	0.93	34.3	277	314.57	347.67
CPX 08-01	42-43 cm	1996.31	64.2	0.0117	0.0868454	0.728213	0.184841	2	0.73	1.57	1.4	0.95	0.1	1.5	7.76	1.29	19.6	36.9	0.1	0.38	0.62	1.85	1.28	39.7	294	337.93	374.83
CPX 08-01	44-45 cm	1996.08	64.4	0.0126	0.094713	0.745836	0.159351	1.71	0.75	1.47	1.34	0.96	< 0.07	1.39	8.72	1.17	21.4	38.91	0.11	0.42	0.59	2.07	1.29	43.3	333	380.78	419.69
CPX 08-01	46-47 cm	1995.69	58.5	0.014	0.0968559	0.778031	0.125113	3.38	1.17	2.41	1.71	1.09	< 0.09	1.46	10.2	1.1	30.3	52.82	0.1	0.49	0.71	2.6	1.55	60.2	486	551.65	604.47
CPX 08-01	48-49 cm	1995.3	67.2	0.0145	0.0760979	0.622189	0.301713	2.26	0.86	1.91	1.38	0.89	< 0.13	1.26	7.52	1.03	24.7	41.81	0.09	0.4	0.49	2.21	1.33	37	106	147.52	189.33
CPX 08-01	50-51 cm	1994.91	58.2	0.0132	0.0781712	0.664781	0.257048	3.37	1.2	2.74	1.87	1.24	< 0.09	1.79	11.4	1.17	33.2	57.98	0.1	0.47	0.62	2.58	1.54	59.3	490	554.61	612.59
CPX 08-01	52-53 cm	1994.53	64.2	0.0124	0.0985933	0.842802	0.0586042	3.32	1.14	2.68	2.39	1.63	0.18	2.23	18.1	2.69	60.6	94.96	0.16	0.53	0.77	3.43	2	86.9	805	898.79	993.75
CPX 08-01	54-55 cm	1994.14	61.3	0.012	0.0811018	0.671083	0.247816	3.26	1.51	2.77	2.54	1.6	0.12	2.67	13.9	2.1	30.7	61.17	0.15	0.66	0.93	2.97	1.77	73.8	552	632.28	693.45
CPX 08-01	57-58 cm	1993.56	ND	0.00642	na	na	na	1.75	0.49	0.98	1.35	0.61	< 0.30	0.74	4.15	0.77	13.3	24.14	< 0.13	< 0.18	< 0.36	1.28	0.58	27.4	248	277.26	301.4
CPX 08-01	59-60 cm	1993.23	ND	0.0138	na	na	na	4.12	1.47	2.19	2.33	1.23	< 0.41	1.56	13.3	1.34	38.7	66.24	< 0.18	0.39	0.68	3.09	1.98	86.7	892	984.84	1050
CPX 08-01	60-61 cm	1993.04	69.9	0.00763	na	na	na	6.37	2.3	5.61	3.76	1.95	0.16	2.69	14.7	1.97	49.3	88.81	0.11	0.62	0.91	4.2	2.26	115	988	1110	1200
CPX 08-01	62-63 cm	1992.65	66.2	0.0105	0.0877792	0.549913	0.362308	3.73	1.38	3.84	2.87	1.36	0.1	1.87	12	1.61	55.6	84.36	0.1	0.55	0.9	4.38	2.36	128	1210	1350	1430
CPX 08-01	64-65 cm	1992.27	64.9	0.0372	0.105954	0.713011	0.181034	4.13	1.43	4.31	3.1	1.41	< 0.13	1.8	10.2	1.41	41.6	69.39	0.13	0.57	0.81	4.12	2.45	95.2	864	967.28	1040
CPX 08-01	66-67 cm	1991.88	66.3	0.0118	0.0887851	0.702859	0.208302	4.1	1.35	4.05	2.83	1.35	< 0.14	1.71	10.3	1.31	46.5	73.5	0.13	0.58	0.83	4.15	2.33	106	1020	1130	1200
CPX 08-01	68-69 cm	1991.5	74.4	0.0085	0.0640935	0.506004	0.429848	4.29	1.59	4.34	3.12	1.62	0.17	2.06	12.1	1.27	48.5	79.06	0.11	0.61	1.02	4.34	2.36	118	984	1110.44	1189.5
CPX 08-01	70-71 cm	1991.11	79.2	0.00437	0.0266439	0.257667	0.715689	2.88	0.97	2.99	2.17	1.01	< 0.10	1.25	8.02	0.99	34.4	54.68	0.08	0.43	0.64	3.26	1.93	74.1	699	779.44	834.12
CPX 08-01	72-73 cm	1990.73	70.1	0.00946	0.0332692	0.291996	0.674735	1.18	0.47	1.15	0.88	0.46	< 0.09	0.48	3	0.41	13.3	21.33	0.05	0.2	0.25	1.13	0.65	32.9	303	338.18	359.51
CPX 08-01	74-75 cm	1990.34	73.8	0.0102	0.0770652	0.516958	0.405977	2.54	1.03	2.19	2.1	1.31	0.12	1.37	12.8	1.65	61.3	86.41	0.15	0.74	0.87	5.56	2.82	131	1270	1410	1500
CPX 08-01	76-77 cm	1989.96	72.2	0.0115	0.11063	0.673903	0.215467	2.43	1.1	2.69	2.48	1.15	0.13	1.17	11.4	1.59	61	85.14	0.13	0.59	0.83	4.49	2.36	116	1150	1270	1360
TBR 09-01	0-1 cm	2009.87	32.4	0.0397	0.0270271	0.733476	0.238386	3.38	1.11	2.5	1.88	0.99	< 0.93	1.38	7.54	< 0.88	23.3	42.08	< 0.42	< 0.56	< 1.11	1.63	< 1.11	38.5	280	320.13	362.21
TBR 09-01	3-4 cm	2009.64	42.6	0.0342	0.0304355	0.716572	0.250335	3.14	1.09	2.52	2.07	1.09	< 0.39	1.54	8.45	0.99	24.8	45.69	< 0.17	0.36	0.53	1.65	0.95	39.9	274	317.39	363.08
TBR 09-01	6-7 cm	2009.37	46.2	0.0286	0.0362723	0.836572	0.126798	2.06	0.88	1.86	1.71	0.85	< 0.29	1.1	6.69	0.85	21.5	37.5	< 0.13	0.33	0.43	1.33	0.78	33.1	237	272.97	310.47
TBR 09-01	9-10 cm	2009.05	50.3	0.0273	0.034882	0.796469	0.168649	2.2	0.84	1.77	1.67	0.84	< 0.32	1.25	6.72	0.87	22.6	38.76	< 0.14	0.32	0.41	1.4	0.82	34.7	274	311.65	350.41
TBR 09-01	12-13 cm	2008.71	47.8	0.0299	0.0408781	0.812581	0.146541	2.51	0.81	1.85	1.49	0.67	< 0.37	1.3	5.21	0.8	17.1	31.74	< 0.17	0.32	< 0.44	1.21	0.88	26.8	184	213.21	244.95
TBR 09-01	15-16 cm	2008.38	52.8	0.0239	0.0407173	0.753165	0.206117	2.75	0.89	2.23	1.83	0.76	< 0.28	1.42	6.24	1.05	19.4	36.57	< 0.13	0.35	0.38	1.26	0.87	28.2	189	220.06	256.63
TBR 09-01	18-19 cm	2008.01	47.8	0.0259	0.0287158	0.703985	0.267299	3.2	1.11	2.75	2.45	0.91	< 0.32	1.6	6.43	1.54	23.8	43.79	< 0.14	0.4	0.39	1.32	1.3	28.6	194	226.01	269.8
TBR 09-01	21-22 cm	2007.65	52.2	0.0267	0.0392557	0.758181	0.202564	3.94	1.36	3.04	3.64	1.15	< 0.38	1.83	8.04	2.88	29.9	55.78	< 0.17	0.41	< 0.46	1.21	0.85	27.6	193	223.07	278.85
TBR 09-01	24-25 cm	2007.28	47.5	0.0275	0.037915	0.758535	0.203208	3.89	1.4	3.43	2.76	0.98	< 0.30	1.39	6.26	1.53	23.6	45.24	< 0.14	0.36	0.38	1.22	0.83	26.7	185	214.49	259.73
TBR 09-01	27-28 cm	2006.94	49.7	0.0257	0.0415044	0.79961	0.158419	3.79	1.22	2.75	1.9	1.04	< 0.27	1.69	6.84	0.96	24.8	44.99	0.15	0.46	0.47	1.4	0.97	30.5	198	231.95	276.94
TBR 09-01	30-31 cm	2006.58	48.1	0	0.0453344	0.793374	0.161292	3.15	1.03	2.34	1.71	0.9	< 0.37	1.5	7.67	0.96	35.3	54.56	< 0.17	0.4	0.45	1.42	0.97	31	206	240.24	294.8
TBR 09-01	33-34 cm	2006.21	50.1	0.026	0.0392032	0.763076	0.197721	3.47	1.06	2.63	1.79	0.88	< 0.25	1.55	6.38	0.88	25.5	44.14	0.12	0.37	0.42	1.46	1.02	29.7	205	238.09	282.23
TBR 09-01	36-37 cm	2005.87	45.5	0.0248	0.0321358	0.7622	0.205665	3.17	1.16	2.84	2.02	0.98	< 0.35	1.7	7.53	0.97	25.4	45.77	< 0.16	0.43	0.47	1.97	1.37	37.8	248	290.04	335.81
TBR 09-01	39-40 cm	2005.52	57.8	0.0222	0.0377106	0.716621	0.245669	2.83	0.99	2.07	1.58	0.86	< 0.26	1.59	6.43	0.95	27.3	44.6	< 0.12	0.32	0.38	1.36	0.93	27.7	188	218.69	263.29
TBR 09-01	42-43 cm	2005.16	42.8	0.0305	0.0385568	0.846298	0.115145	4.36	1.79	3.83	3.09	1.9	< 0.40	3.61	11	1.6	28.7	59.88	< 0.18	0.73	1.08	2.59	2.06	43.9	263	313.36	373.24
TBR 09-01	45-46 cm	2004.85	48.9	0.0261	0.0569534	0.818909	0.124137	2.63	0.86	1.89	1.42	0.79	< 0.30	1.57	5.12	< 0.66	16.5	30.78	< 0.14	0.33	0.37	1.17	0.79	23.5	162	188.16	218.94
TBR 09-01	48-49 cm	2004.52	47.2	0.0246	0.0442449	0.792435	0.16332	3.96	1.28	2.79	2.17	1.28	< 0.32	2.53	9.23	1.29	24.3	48.83	< 0.14	0.46	0.57	1.66	1.11	36.7	253	293.5	342.33
TBR 09-01	51-52 cm	2004.2	45.9	0.0247	0.0455236	0.865963	0.0885135	3.77	1.23	2.8	2.24	1.24	< 0.40	2.48	9.46	< 1.37	27.4	50.62	< 0.18	0.46	0.6	1.74	1.19	40.5	290	334.49	385.11
TBR 09-01	54-55 cm	2003.85	48.9	0.0234	na	na	na	3.32	1.13	2.46	1.95	1.09	< 0.27	2.25	8.29	1.18	25.7	47.37	< 0.12	0.42	0.54	1.6	1.07	35	243	281.63	329
TBR 09-01	57-58 cm	2003.47	50.9	0.0236	0.0516493	0.775794	0.172556	4.19	1.41	3.58	2.71	1.43	< 0.27	2.52	9.88	1.34	36.4	63.46	< 0.12	0.52	0.59	1.97	1.58	43.9	307	355.56	419.02
TBR 09-01	60-61 cm	2003.12	52.5	0.0221	0.0595961	0.785444	0.154377	2.78	0.63	2.12	1.77	0.94	< 0.21	1.54	7.42	1.01	25.8	44.01	0.17	0.47	0.52	1.58	1.13	36.5	265	305.37	349.38
TBR 09-01	63-64 cm	2002.95	66.6	0.00712	0.0314791	0.40185	0.566671	1.74	0.81	1.19	0.93	0.44	< 0.20	0.71	3.42	0.43	13.2	22.87	< 0.09	0.21	< 0.24	0.79	0.5	18.3	138	157.8	180.67
TBR 09-01	66-67 cm	2002.48	46.1	0.0274	0.0572406	0.815385	0.127018	3.99	1.12	3.01	2.43	1.29	< 0.28	2.16	11.2	1.34	39.1	65.64	0.17	0.56	0.67	2.14	1.48	49.4	339	393.42	459.06
TBR 09-01	69-70 cm	2001.71	55.8	0.0218	0.0632048	0.75156	0.185235	2.75	0.52	2.74	3.06	1.1	< 0.19	1.8	8.48	1.83	27.5	49.78	0.11	0.42	0.51	1.72	1.19	36.5	266	306.45	356.23
TBR 09-01	72-73 cm	2001.32	73.5	na	0.00538589	0.064798	0.929816	0.85	0.48	0.79	0.57	0.27	< 0.14	0.31	1.76	0.21	6.95	12.19	< 0.06	0.11	< 0.16	0.41	0.28	7.31	46	54.11	66.3
TBR 09-01	75-76 cm	2001.32	77.4	0.00655	0.00965577	0.125233	0.865112	1.12	0.83	1.87	1.82	0.96	< 0.13	1.69	4.91	0.5	6.91	20.61	< 0.06	0.26	0.3	0.53	0.35	7.31	44.3	53.05	73.66
TBR 09-01	78-79 cm	2000.79	48.1	0.0286	na	na	na	3.9	1.67	2.81	2.54	1.47	< 0.22	2.49	12.9	1.64	37.7	67.12	0.13	0.52	0.82	2.49	1.83	53.5	372	431.29	498.41
TBR 09-01	81-82 cm	2000.21	49.9	0.0264	0.067751	0.756287	0.174062	3.33	1.22	2.66	2.08	2.33	< 0.35	1.64	10.9	1.25	36.2	61.61	0.26	0.57	0.87	2.28	1.44	51.9	366	423.32	484.93
TBR 09-01	84-85 cm	1999.65	47.5	0.0268	na	na	na	4.32	1.54	3.27	2.59	3.61	< 0.28	2.07	13.5	1.48	46.2	78.58	0.28	0.63	0.86	2.7	1.52	63.9	464	533.89	612.47
TBR 09-01	87-88 cm	1998.86	50.3	0.0236	0.0744427	0.802442	0.123115	4.34	1.47	3.23	2.48	2.66	< 0.31	2.13	12.2	1.51	51.9	81.92	0.3	0.6	0.78	2.42	1.44	58.5	430	494.04	575.96
TBR 09-01	90-91 cm	1998.02	46.5	0.0282	0.0881469	0.858963	0.0528902	4.15	1.67	3.33	2.83	1.32	< 0.57	2.45	13.9	1.63	50.7	81.98	< 0.26	0.73	0.96	2.94	1.6	69.8	526	602.03	684.01
TBR 09-01	93-94 cm	1997.14	49.8	0.0264	0.0646836	0.810622	0.124694	4.33	1.57	3.3	2.53	3.68	< 0.33	1.96	14.1	1.82	57.3	90.59	0.37	0.78	0.94	3.09	1.73	74.5	570	651.41	742
TBR 09-01	96-97 cm	1996.15	45.1	0.0291	0.0677053	0.855418	0.0768764	5.1	1.82	3.94	3.11	4.68	< 0.30	2.4	16	1.91	59.2	98.16	< 0.12	0.84	1.06	3.62	1.96	80.9	563	651.38	749.54
TBR 09-01	99-100 cm	1995.2	49.6	0.0251	0.071007	0.853263	0.0757296	5.97	1.95	4.36	3.06	5.17	< 0.35	2.22	16.3	1.95	60.7	101.68	0.34	0.9	1.02	3.61	1.94	82.8	594	684.61	786.29
TBR 09-01	102-103 cm	1994.23	51.4	0.0223	na	na	na	4.77	1.81	3.38	2.74	1.46	< 0.22	2.84	12.2	1.58	46.3	77.08	0.14	0.58	0.91	2.56	1.72	60	507	572.91	649.99
TBR 09-01	105-106 cm	1993.85	68.1	0.00905	0.0516147	0.494828	0.453558	2.2	0.55	1.81	1.56	0.74	< 0.16	1.46	5.97	0.91	37.9	53.1	< 0.07	0.26	0.39	1.3	0.63	31.4	247	280.98	334.08
TBR 09-01	108-109 cm	1993.51	50.1	0.0226	0.102701	0.824701	0.072598	5.51	2.48	4.51	4.45	2.79	< 0.28	11.9	18.3	3.86	63.8	117.6	0.2	0.73	1.02	3.54	1.82	86.1	685	778.41	896.01
TBR 09-01	111-112 cm	1993.21	55.1	0.0222	0.0906203	0.795672	0.113708	4.69	2.13	4.31	2.98	1.62	< 0.28	2.86	14.6	1.7	63.7	98.59	0.13	0.6	1.02	2.95	1.72	72.3	608	686.72	785.31
TBR 09-01	114-115 cm	1992.97	75.4	na	0.0136028	0.159176	0.827221	1.4	0.53	1.17	0.87	0.41	< 0.17	0.69	3.62	0.4	18.5	27.59	< 0.08	0.18	0.25	0.85	0.45	23.1	203	227.83	255.42
TBR 09-01	117-118 cm	1992.8	61.1	0.0185	0.0928163	0.832467	0.0747165	3.38	1.51	1.54	2.25	1.28	< 0.22	2.92	12.2	1.31	42	68.39	0.13	0.54	0.75	2.29	1.3	57.6	475	537.61	606
TBR 09-01	120-121 cm	1992.46	51.3	0.0221	na	na	na	8.65	4.06	26	8.1	3.76	< 0.42	13.3	32.2	3.74	89.7	189.51	0.32	1.22	1.52	5	2.56	119	862	991.62	1180
BRE 08-01	0-1 cm	2008.5	62	0.0223	na	na	na	2.06	0.6	2.41	1.25	0.54	< 0.16	0.91	3.5	0.7	12.6	24.57	0.09	0.22	0.2	0.79	0.54	14.3	116	132.14	156.71
BRE 08-01	4-5 cm	2007.28	62	0.0149	0.0409899	0.467434	0.491411	2.45	0.56	2.54	1.35	0.59	< 0.16	0.9	3.71	0.57	13.2	25.87	0.13	0.3	0.23	0.88	0.72	18.1	132	152.36	178.23
BRE 08-01	8-9 cm	2006.06	68.3	0.0121	0.0280807	0.326863	0.644917	2.55	0.84	1.55	1.1	0.53	< 0.12	0.91	3.55	0.66	17	28.69	0.11	0.27	0.24	0.8	0.55	15.8	130	147.77	176.46
BRE 08-01	12-13 cm	2004.84	68.4	0.0118	0.0335681	0.384294	0.582097	2.58	0.85	2.31	1.31	0.64	< 0.12	1.05	4.68	0.87	16.8	31.09	< 0.09	0.24	0.28	1.04	0.7	20.3	140	162.56	193.65
BRE 08-01	16-17 cm	2003.61	68.7	0.0103	0.0383945	0.405011	0.55654	3.14	1.02	1.76	1.29	0.63	< 0.11	0.99	4.92	0.79	21.9	36.44	0.09	0.32	0.33	1.12	0.77	23.4	197	223.03	259.47
BRE 08-01	20-21 cm	2002.3	67.2	0.0132	0.0488153	0.537303	0.413841	3.56	1.25	1.83	1.69	0.77	< 0.15	1.25	6.16	0.96	27.9	45.37	< 0.09	0.33	0.36	1.37	1.01	27.2	233	263.27	308.64
BRE 08-01	24-25 cm	2000.9	51.6	0.0179	0.0597945	0.615896	0.324243	5.57	1.78	3.11	2.79	1.48	< 0.14	2.35	12.1	1.99	51.3	82.47	0.22	0.6	0.68	2.38	1.69	51.8	432	489.37	571.84
BRE 08-01	28-29 cm	1999.5	68.5	0.0116	0.038811	0.441953	0.519236	3.16	0.84	2.38	1.58	0.76	< 0.12	1.1	6.1	1.05	26.4	43.37	0.12	0.31	0.34	1.24	0.91	27.9	255	285.82	329.19
BRE 08-01	32-33 cm	1998.1	70.5	0.0104	0.0330305	0.398027	0.568942	3.4	0.98	1.75	1.9	1.05	< 0.12	1.3	9.32	1.85	31.8	53.35	< 0.09	0.37	0.42	1.63	1.11	35.2	306	344.73	398.08
BRE 08-01	36-37 cm	1996.7	68.2	0.0106	0.0173072	0.218857	0.763699	3.67	1.3	3.19	1.98	1.14	< 0.13	1.5	10.4	1.58	49	73.76	0.14	0.48	0.48	2.29	1.32	48.7	474	527.41	601.17
BRE 08-01	40-41 cm	1995.3	74.7	0.00345	0.025765	0.287968	0.686267	2.52	0.38	2.26	1.54	0.75	< 0.11	0.68	4.76	< 0.23	21.1	33.99	< 0.16	< 0.18	< 0.08	0.57	< 0.08	20.8	170	191.37	225.36
BRE 08-01	44-45 cm	1993.9	71.1	0.0134	0.026799	0.301954	0.671247	3.62	1.39	2.63	1.68	1.1	< 0.11	1.47	6.81	0.98	112	131.68	0.16	0.38	0.48	2.08	1.09	43.2	404	451.39	583.07
BRE 08-01	48-49 cm	1992.5	73.8	0.00428	0.021493	0.248393	0.73001	2.74	0.93	2.36	1.32	0.73	< 0.07	1	4.61	0.71	31.9	46.3	0.11	0.29	0.36	1.58	0.83	31.4	283	317.57	363.87
BRE 08-01	50-51 cm	1991.79	67	0.011	0.0497304	0.519267	0.431003	4.38	1.5	5.37	3.41	1.27	< 0.17	2.14	8.36	1.16	90	117.59	0.18	0.7	0.94	3.76	2.26	95.5	790	893.34	1010
BRE 08-01	52-53 cm	1991.09	72.3	0.0116	0.0452123	0.46617	0.488617	1.33	1.99	6.6	6.5	1.93	< 0.19	2.44	11.7	2.42	56.4	91.31	0.17	0.6	0.94	4.54	2.88	74.6	591	674.73	766.04
BRE 08-01	55-56 cm	1990.04	70.9	0.0081	na	na	na	4.66	1.14	3.74	3.08	0.94	< 0.15	1.47	6.25	1.16	30.6	53.04	0.4	0.49	0.46	2.01	1.11	45.2	400	449.67	502.71
BRE 08-01	56-57 cm	1989.34	63.3	0.0154	na	na	na	5.75	3.29	7.42	5.66	3.33	< 0.24	6.15	14.4	2.48	64.6	113.08	0.58	2.12	1.33	7.24	4.27	113	968	1100	1210
BRE 08-01	59-60 cm	1988.64	70.9	0.00615	0.106166	0.771833	0.122001	4.45	1.85	6.17	4.46	1.88	< 0.19	2.89	10.4	1.49	62.6	96.19	0.26	0.91	1.06	4.35	2.89	93.4	803	905.87	1000
BRE 08-01	60-61 cm	1987.77	67.5	0.0189	0.0977548	0.776287	0.125959	5.34	1.8	5.46	2.96	1.75	< 0.13	2.79	10.1	1.44	90	121.64	0.22	0.71	0.98	4.14	2.39	89.6	952	1050.04	1170
BRE 08-01	64-65 cm	1986.89	60	0.0141	0.0677396	0.675937	0.256323	9.52	3.3	8.41	6.47	3.67	< 0.28	4.98	23.8	3.89	134	198.04	0.46	1.63	1.94	7.47	3.92	190	1640	1840	2040
BRE 08-01	68-69 cm	1985.96	72.9	0.0058	0.0251102	0.306171	0.668608	3.15	1.24	2.26	1.74	0.79	< 0.11	1.07	4.58	0.84	35.9	51.57	0.18	0.42	0.36	1.58	0.74	37.7	312	352.98	404.55
BRE 08-01	72-73 cm	1985.39	72.8	0.00987	0.0553996	0.560817	0.383783	5.84	2.18	13.9	7.78	4.12	< 0.25	10.3	42.6	6.14	311	403.86	0.27	0.95	1.02	9.04	1.97	381	1320	1710	2110
BRE 08-01	76-77 cm	1984.82	62.9	0.0121	0.0787997	0.759818	0.161383	12.7	3.34	23.4	24	11.8	< 0.78	28.7	77.5	9.52	396	586.96	1.03	3.87	4.48	14.7	7.58	458	3600	4089.66	4680
BRE 08-01	79-80 cm	1984.4	72.6	0.00376	na	na	na	5.24	1.81	4.73	3.95	2.45	< 0.22	4.25	18.6	2.16	57.9	101.09	0.58	1.23	1.53	3.48	2.02	85.9	637	731.74	832.83
BRE 08-01	83-84 cm	1983.29	61	0.0154	na	na	na	12.3	7.54	21.4	21.6	14.5	< 1.85	26	107	13.1	247	470.44	2.08	6.25	7.6	15.7	11.6	319	2050	2410	2880.44
BRE 08-01	88-89 cm	1979.76	60.8	0.0114	0.105074	0.824754	0.0701132	9.23	6.59	12	15	11	< 1.14	18.8	85.2	10.2	94.9	262.92	2.04	6.68	6.63	11.4	8.76	157	731	923.51	1190
BRE 08-01	92-93 cm	1976.93	60	0.00939	0.0978538	0.855175	0.0468704	9.63	6.26	10.9	15.6	11.8	< 0.86	19.6	97.2	11.4	102	284.39	2	7.25	6.99	11.4	9.24	165	802	1000	1280
BRE 08-01	96-97 cm	1974.1	60.8	0.0124	0.0965853	0.859331	0.0440832	9.02	6.9	11.2	17.1	14.3	< 1.35	23.8	118	13.9	116	330.22	2.08	8.14	8.79	14.2	11.6	198	874	1120	1450.22
BRE 08-01	100-101 cm	1971.27	62.8	0.0117	0.0940291	0.870452	0.0354674	7.33	4.45	9.48	11.8	9.19	< 0.72	14.9	71.6	8.43	80.3	217.48	1.38	4.72	5.37	9.58	7.52	148	761	937.57	1160
BRE 08-01	104-105 cm	1968.44	60.5	0.0169	0.0764083	0.63198	0.291612	26.1	7.24	42.9	25	17.2	< 0.88	37.1	105	15.2	450	725.74	1.32	5.71	7.82	22.4	12	598	4280	4930	5660
ARS 10-02	0 - 2 cm	2010.08	37.6	0.0328039	0.0392148	0.746105	0.214514	3.3	0.94	2.08	1.56	0.58	< 0.31	1.06	5.13	0.88	18.8	34.33	<0.14	0.34	<0.37	1.12	0.64	19	233	254.1	288.43
ARS 10-02	5 - 7 cm	2008.43	42.5	0.023901	0.0551509	0.871044	0.0738055	3.49	0.96	2.5	2.17	1	< 0.24	1.6	7.73	1.27	25.7	46.42	< 0.11	0.51	0.55	1.62	1.01	42	304	349.69	396.11
ARS 10-02	10 - 12 cm	2006.93	45	0.0225887	0.0491061	0.830454	0.12044	3.7	1.23	2.32	2.17	0.99	< 0.19	1.74	8.61	1.39	46.1	68.25	< 0.08	0.41	0.57	1.9	1.17	49.9	373	426.95	495.2
ARS 10-02	15 - 17 cm	2005.4	47.1	0.0213321	0.05322	0.846137	0.100643	4.31	1.76	3.31	2.92	1.71	< 0.18	2.72	11.3	1.67	50	79.7	0.19	0.66	0.8	2.37	1.44	58.7	454	518.16	597.86
ARS 10-02	20 - 22 cm	2003.95	50.2	0.0226534	0.0579228	0.8474	0.0946773	3.88	1.47	1.97	2.34	1.27	< 0.15	2.03	10.5	1.69	48.5	73.65	< 0.07	0.48	0.7	2.03	1.45	58.2	410	472.86	546.51
ARS 10-02	25 - 27 cm	2003.24	49.4	0.0195244	0.0530087	0.827755	0.119236	3.81	2.51	2.18	2.29	1.34	< 0.17	2.2	10.6	1.5	48.3	74.73	0.09	0.58	0.8	2.1	1.25	48.5	393	446.32	521.05
ARS 10-02	30 - 32 cm	2002.26	51.5	0.0207546	0.0661546	0.825198	0.108647	4.38	3.39	1.44	2.05	1.23	< 0.14	2.07	9.69	1.48	34	59.73	0.19	0.44	0.76	1.78	1.04	42.1	335	381.31	441.04
ARS 10-02	35 - 37 cm	2001.3	51.6	0.0224395	0.0630651	0.806348	0.130587	4.47	3.64	2.08	2.63	1.53	< 0.13	2.35	13.8	1.86	57.3	89.66	0.29	0.59	1.2	3.59	2.33	111	886	1000	1089.66
ARS 10-02	40 - 42 cm	2000.02	51.3	0.0204231	0.0626931	0.806325	0.130982	4.82	2.76	2.48	3.12	1.62	< 0.15	2.43	13	1.87	55.6	87.7	0.23	0.57	0.93	2.57	1.72	57.5	473	536.52	624.22
ARS 10-02	45 - 47 cm	1998.96	51.3	0.0215318	0.0585908	0.849606	0.091803	5.4	1.65	4.02	4.04	2.52	< 0.13	3.59	18.4	2.99	71.4	114.01	0.22	0.79	1.22	4.83	4	121	909	1040	1150
ARS 10-02	50 - 52 cm	1997.79	53.3	0.0199852	0.0660966	0.831626	0.102277	4.52	1.36	3.2	3.08	1.74	< 0.15	2.83	15.6	2.28	87.4	122.01	0.19	0.56	1.02	2.46	1.47	81.6	758	845.3	1310
ARS 10-02	55 - 57 cm	1996.56	53.7	0.0200887	0.0689958	0.85748	0.073524	6.14	1.94	3.81	4.1	2.34	< 0.14	3.66	23.8	4.09	107	156.88	0.32	0.87	1.32	3.5	2.37	120	1020	1150	1310
ARS 10-02	60 - 62 cm	1995.21	57.5	0.0160851	0.0896618	0.862738	0.0476002	4.42	1.59	3.1	3.38	1.97	< 0.15	2.8	18.5	2.24	89.7	127.7	0.17	0.7	0.98	3.22	2.25	104	866	977.32	1100
ARS 10-02	65 - 67 cm	1993.89	53.4	0.0164467	0.0786086	0.860533	0.060858	4.75	1.51	3.26	3.41	2.08	< 0.14	3.33	26.7	2.84	79.6	127.48	0.2	0.64	1.04	3.26	2.1	97.6	819	923.84	1050
ARS 10-02	70 - 72 cm	1992.57	51	0.0194642	0.0859508	0.859518	0.0545315	5.12	1.94	3.89	5.23	3.43	< 0.14	5.19	46.7	3.77	110	185.27	0.09	1	1.17	4.28	2.24	121	950	1079.78	1260
ARS 10-02	75 - 77 cm	1991.37	49.8	0.0221244	0.0709963	0.860494	0.0685093	6.46	2.35	4.69	5.72	3.6	< 0.18	4.36	50.1	3.28	168	248.56	0.21	0.99	1.46	5.95	3.78	181	1680	1870	2120
ARS 10-02	80 - 82 cm	1990.15	55.5	0.0158274	0.11115	0.845225	0.0436246	5.26	2.36	4.52	4.78	2.54	< 0.13	3.54	19.4	2.93	125	170.33	0.17	0.91	1.25	4.98	2.83	137	1140	1290	1460.33
ARS 10-02	85 - 87 cm	1988.96	49	0.0166502	0.0917931	0.853461	0.0547456	7.45	3.11	6.72	5.47	2.81	< 0.15	3.61	21.4	2.9	151	204.47	0.17	0.87	1.37	6.04	3.6	178	1610	1800.05	2000
ARS 10-02	90 - 92 cm	1987.64	56	0.0179913	0.0884668	0.823973	0.0875602	7.66	3.09	7.23	5.7	3.11	< 0.13	3.9	21.6	3.18	212	267.47	0.22	0.97	1.5	6.12	3.92	188	1690	1890	2160
ARS 10-02	95 - 97 cm	1986.3	55.5	0.0196701	0.0775629	0.838871	0.0835656	10.2	4.91	12.2	10.7	5.2	< 0.13	6.83	35.5	5.36	251	341.9	0.27	1.95	3.31	14.7	10.3	384	2750	3160	3500
ARS 10-02	100 - 102 cm	1985.04	54	0.01702	0.0824185	0.847445	0.0701363	11.7	4.58	9.55	8.59	4.9	< 0.16	6.15	31.5	5.11	192	274.08	0.53	2.83	3.8	17.5	14.6	428	3110	3580	3850
ARS 10-02	105 - 107 cm	1983.77	51.9	0.0177768	0.0906506	0.855628	0.0537215	4.91	7.81	7.71	7.92	4.91	0.28	6.03	38.5	5.28	303	386.35	0.51	2.66	4.2	17.9	10.8	515	3940	4490	4880
ARS 10-02	110 - 112 cm	1982.51	56.7	0.0163039	0.0826507	0.827663	0.0896862	6.93	2.66	5.7	6.6	4.71	< 0.14	6	37.9	4.91	244	319.41	0.47	2.35	2.84	18	9.63	536	4060	4630	4950
ARS 10-02	115 - 117 cm	1981.19	53.4	0.0161552	0.0729882	0.832277	0.0947343	11.3	11.8	15.4	11.8	7.81	0.29	11.9	49.8	7.8	279	406.9	0.69	3.23	4.13	20.2	12.3	587	4700	5330	5740
ARS 10-02	120 - 122 cm	1979.79	55	0.0152699	0.0666667	0.81313	0.120203	11	9.07	16.8	11.8	8.17	< 0.16	14.6	53.1	7.86	310	442.4	0.64	4.01	4.92	18.8	12.4	508	3830	4380	4820
ARS 10-02	125 - 127 cm	1978.49	55.2	0.0174881	0.0834288	0.82653	0.0900414	5.81	8.01	15.9	9.24	5.5	< 0.25	7.72	39.7	4.85	454	550.73	0.52	3.62	3.5	16.4	6.78	472	4210	4710	5260
ARS 10-02	130 - 132 cm	1977.2	53.9	0.0243466	0.065269	0.83199	0.102741	17.8	12.1	24.8	9.08	5.4	< 0.25	7.59	55.2	7.16	486	625.13	0.6	5.55	3.44	16.1	6.66	463	4140	4640	5260
GEC 11-04	0 - 2 cm	2011.18	58	0.021	0.0388348	0.70517	0.255955	2.72	1.13	1.87	26.9	1.19	0.76	0.73	21.4	3.73	145	205.43	1.97	0.56	0.53	4.44	1.82	120	1350	1480	1680
GEC 11-04	4 - 6 cm	2010.26	63.6	0.0114	0.0386602	0.625976	0.335249	7.49	5.06	4.6	139	6.31	4.09	2.95	306	23.8	2950	3450	15.5	4.02	3.01	33.7	11	1370	11200	12600	16000
GEC 11-04	8 - 10 cm	2009.13	65.3	0.0111	0.050259	0.710758	0.238983	3.77	2.22	2.47	45.6	2.35	2.43	1.28	33.2	4.96	259	357.28	6.86	2	2.71	74.6	382	286	3490	4240	4600
GEC 11-04	12 - 14 cm	2008	57.3	0.013	0.0456878	0.683085	0.271152	7.76	2.7	4.69	7.07	3.3	1.9	3.39	37.9	5.66	299	373.37	7.59	1.3	1.74	13.4	5.39	342	4760	5130	5500
GEC 11-04	16 - 18 cm	2006.77	67.7	0.0105	0.0241112	0.440776	0.534998	16.6	72.9	31.2	244	70.7	32.6	15.5	113	57.2	317	970.7	7.25	2.15	1.72	12.5	5.64	291	3760	4080.26	5050
GEC 11-04	20 - 22 cm	2005.63	72.1	0.0119	0.0492786	0.72136	0.229361	5.7	4	5.4	11.3	3.43	1.61	2.05	47.5	7.82	499	587.81	8.75	1.37	1.33	14	5.47	484	5780	6300	6890
GEC 11-04	24 - 26 cm	2004.52	64.1	0.0115	0.0636479	0.815601	0.120724	6.39	4.59	3.44	14.2	5.74	2.84	1.55	90	11.4	1010	1150.15	14.5	3.28	2.14	23.5	9.31	1090	11900	13000	14200
GEC 11-04	28 - 30 cm	2003.6	65.7	0.0109	0.0500502	0.726083	0.223813	3.82	2.55	2.31	7.75	2.65	1.65	1.03	30	5.08	407	463.84	8.86	1.06	1.17	10.5	3.85	400	5030	5460	5920
GEC 11-04	32 - 34 cm	2002.94	66.2	0.00785	0.0481958	0.523173	0.428631	6.05	3.91	5.75	15.7	6.54	4.12	3.85	53.1	9	384	492.02	9.75	2.97	6.67	48.5	23.5	862	8820	9770	10300
GEC 11-04	36 - 38 cm	2002.31	58	0.0137	0.0388786	0.572854	0.388268	5.91	3.18	5.03	8.35	4.39	2.06	3.62	56.8	7.99	493	590.33	8.86	2.08	2.86	22.2	10.8	590	8220	8860	9450.33
GEC 11-04	40 - 42 cm	2001.82	67.6	0.0191	0.0462962	0.581715	0.371989	7.06	4.33	5.93	12.8	6.54	3.35	4.84	84.2	12.8	736	877.85	11	3.5	5.52	44.6	19.8	1080	13200	14400	15300
GEC 11-04	44 - 46 cm	2001.29	63	0.0128	0.0582053	0.713219	0.228552	12.3	8.11	10.1	31.1	12	7.03	8.14	226	37.6	1920	2270	31	5.38	5.58	56.5	25.3	1410	19200	20700	23000
GEC 11-04	48 - 50 cm	2000.18	49.5	0.0137	0.075531	0.84186	0.0826094	16.7	9.37	12	31.1	13.6	8.74	10.2	220	35.8	2240	2600	26.6	6.83	11.9	101	44.9	2950	42900	46000	48600
GEC 11-04	52 - 54 cm	1998.96	56.1	0.0118	0.0655112	0.826524	0.107913	23	13.3	19.6	47.2	22.9	13.2	17	320	48.8	3150	3680	22.6	11.2	22.7	187	87.1	4600	62300	67200	70900
GEC 11-04	56 - 58 cm	1997.83	46.7	0.0156	0.0891674	0.875626	0.0352066	5.51	2.68	4.89	12.1	4.85	3.85	4.1	142	13.1	1940	2130	4.2	2.54	6.09	78.6	25.3	2910	37900	40900	43000
GEC 11-04	60 - 62 cm	1996.68	79.2	0.0194	0.0770999	0.830061	0.0928394	7.82	4.14	7.9	13.4	7.63	3.68	5.56	105	13.3	1120	1290	8.96	3.13	5.71	54.1	26	1400	20700	22200	23500
GEC 11-04	64 - 66 cm	1995.44	60.9	0.0113	0.0752115	0.80115	0.123638	14.9	8.74	19.6	30.8	15.6	8.21	13.3	197	28.3	1920	2260	16.9	7.33	10.2	105	50.8	2490	30100	32800	35100
GEC 11-04	68 - 70 cm	1994.09	69.9	0.0125	0.0464563	0.677098	0.276446	17.9	10.6	21.6	45.7	19.9	11.6	15.1	281	33.7	2690	3150	27.7	9.94	17.7	187	87.3	3980	25400	29700	32800
GEC 11-04	72 - 74 cm	1993.97	50	0.0237	0.0590003	0.826299	0.114701	37.9	20.1	26.5	49.4	25.2	11.4	16.5	434	57.7	5140	5820	103	15.7	15.8	165	63.2	6830	56800	64000	69800
GEC 11-04	76 - 78 cm	1993.89	53.6	0.022	0.0594555	0.856706	0.0838387	18.2	11.1	15.1	33.6	14.5	7.1	9.44	277	36.5	3110	3530	212	10.6	6.35	70	26	2570	28500	31400	34900
GEC 11-04	80 - 82 cm	1993.79	67.4	0.013	0.0634524	0.758144	0.178404	12.5	6.75	8.38	298	29.6	7.03	7.01	362	88.6	2060	2880	172	11.2	5.11	53.6	9.75	1590	9030	10900	13800
GEC 11-04	84 - 86 cm	1991.76	60.4	0.0136	0.0778619	0.795532	0.126606	25.4	15.4	15.8	56.1	20.1	11.6	13.2	349	48.4	2590	3140	191	18.6	6.73	70.9	20.8	2100	5670	8080	11200
GEC 11-04	88 - 90 cm	1990	86.4	0.0138	0.0847238	0.828756	0.0865205	16.8	6.69	10	27.8	12	8.01	9.42	307	31.7	2670	3100	104	17.8	4.67	63.8	11.2	2060	5400	7660	10800
GEC 11-04	92 - 94 cm	1988.28	55.3	0.0149	0.0870562	0.884843	0.0281005	22.3	11.1	13.8	30.1	19.1	9.97	12.2	279	35.4	2410	2840	51.3	31.5	4.3	55.7	10.4	1930	5070	7150	9990
GEC 11-04	96 - 98 cm	1986.78	53.6	0.0177	0.108854	0.882043	0.00910335	27.8	16.4	17.5	44.4	26.1	13.2	15.2	314	55.9	2620	3150	49.3	15.9	4.48	56.1	14.2	1570	6340	8049.98	11200
							count NDs	5	6	6	6	10	177	5	1	18	9		72	18	34	9	14	2	8	0
							% NDs	0.0217391	0.026087	0.026087	0.026087	0.0434783	0.769565	0.0217391	0.00434783	0.0782609	0.0391304		0.313043	0.0782609	0.147826	0.0391304	0.0608696	0.00869565	0.0347826	67200
							0.05	0.628	0.37	0.496	0.5415	0.3695	0.11	0.48	1.25	0.41	4.71		0.08	0.1655	0.3	0.41	0.3575	5.214	44.305	36.082
							0.25	2.06	0.73	1.5475	1.3175	0.7875	0.14	1.17	5.29	0.89	16.8		0.12	0.33	0.4675	1.26	0.85	26.675	185.25	190.5
							0.5	3.4	1.21	2.34	2.17	1.235	0.29	1.75	9.69	1.345	34		0.2	0.545	0.775	2.28	1.44	49.55	385	416.89
							0.75	5.16	2.015	4.0275	3.9725	2.4675	4.12	2.86	18.8	2.885	89.7		0.57	0.9925	1.33	5	2.7825	121	964	1077.34
							0.95	16.26	9.0205	16.665	31.055	14.5	12.24	14.84	210.8	32.6	1940		28.195	7.286	6.685	56.1	21.475	1514	11091.5	11835

## Sheet: S-4 Detections
Table S-4. Number of samples analyzed (n) and frequency of non-detections at each coring site for PCDFs and PCDDs.
Site	n	2378-TetraCDF	12378-PentaCDF	23478-PentaCDF	123478-HexaCDF	123678-HexaCDF	123789-HexaCDF	234678-HexaCDF	1234678-HeptaCDF	1234789-HeptaCDF	OctaCDF	2378-TetraCDD	12378-PentaCDD	123478-HexaCDD	123678-HexaCDD	123789-HexaCDD	1234678-HeptaCDD	OctaCDD
ETL	33	0.152	0.182	0.182	0.182	0.303	1	0.152	0.03	0.394	0.273	0.909	0.424	0.727	0.273	0.364	0.061	0.242
MTE	35	0	0	0	0	0	0.514	0	0	0.029	0	0.143	0	0.057	0	0	0	0
CPX	39	0	0	0	0	0	0.769	0	0	0	0	0.103	0.051	0.026	0	0	0	0
TBR	41	0	0	0	0	0	1	0	0	0.073	0	0.61	0.024	0.122	0	0.024	0	0
BRE	30	0	0	0	0	0	1	0	0	0.033	0	0.133	0.033	0.033	0	0.033	0	0
ARS	27	0	0	0	0	0	0.926	0	0	0	0	0.148	0	0.037	0	0	0	0
GEC	25	0	0	0	0	0	0	0	0	0	0	0	0	0	0	0	0	0
Overall	230	0.0217391	0.026087	0.026087	0.026087	0.0434783	0.769565	0.0217391	0.00434783	0.0782609	0.0391304	0.313043	0.0782609	0.147826	0.0391304	0.0608696	0.00869565	0.0347826

## Sheet: S-5 %tiles
Table S-5. Distributions of congener concentrations based on percentiles. <RL = less than reporting level.
congener	percentile
	0.05	0.25	0.5	0.75	0.95
2378-TetraCDF	0.45	1.9325	3.38	5.115	15.835
12378-PentaCDF	0.329	0.6925	1.175	1.9475	8.9215
23478-PentaCDF	0.3445	1.4325	2.315	3.9275	16.395
123478-HexaCDF	0.358	1.2425	2.17	3.7975	30.965
123678-HexaCDF	0.1935	0.75	1.19	2.3475	14.41
123789-HexaCDF	<RL	<RL	<RL	<RL	7.03
234678-HexaCDF	0.2845	1.1	1.715	2.8375	14.765
1234678-HeptaCDF	1.1335	5.23	9.575	18.75	209.65
1234789-HeptaCDF	<RL	0.8325	1.29	2.6125	30.17
octaCDF	2.316	14.5	31.8	87.4	1930
2378-TetraCDD	<RL	<RL	0.14	0.32	16.27
12378-PentaCDD	<RL	0.3025	0.485	0.91	7.061
123478-HexaCDD	<RL	0.38	0.655	1.1025	6.504
123678-HexaCDD	0.26	1.2125	2.16	4.82	55.92
123789-HexaCDD	<RL	0.79	1.31	2.42	20.35
1234678-HeptaCDD	4.826	26.6	49.4	121	1510
octaCDD	44.305	185.25	385	964	11100

## Sheet: S-6 TEQ
Table S-6. Dioxin toxic equivalency (TEQ) for sediment core samples. TEQ was computed based on Van den Berg et al., 2006.
Sample	Depth (cm)	Date	Sum PCDF TEQ	Sum PCDD TEQ	Sum PCDD/F TEQ
ETL 10-02	0-1 cm	2009.67	0.347812	0.267	0.614812
ETL 10-02	2-3 cm	2008.49	0.264854	0.05648	0.321334
ETL 10-02	4-5 cm	2007.09	0.244509	0.18851	0.433019
ETL 10-02	6-7 cm	2006.02	0.26311	0.19668	0.45979
ETL 10-02	8-9 cm	2004.97	0.285239	0.07221	0.357449
ETL 10-02	10-11 cm	2004.46	0.307595	0.1262	0.433795
ETL 10-02	12-13 cm	2003.35	0.408306	0.24957	0.657876
ETL 10-02	14-15 cm	2002.25	0.468901	0.28321	0.752111
ETL 10-02	16-17 cm	2001.17	0.397597	0.29292	0.690517
ETL 10-02	18-19 cm	2000.16	0.436113	0.32984	0.765953
ETL 10-02	20-21 cm	1999.23	0.442053	0.18627	0.628323
ETL 10-02	22-23 cm	1998.37	0.477627	0.31486	0.792487
ETL 10-02	24-25 cm	1997.44	0.5586	0.48791	1.04651
ETL 10-02	26-27 cm	1996.44	0.701986	0.85207	1.55406
ETL 10-02	28-29 cm	1995.29	0.882686	1.0024	1.88509
ETL 10-02	30-31 cm	1994.11	0.716313	0.8519	1.56821
ETL 10-02	32-33 cm	1993.03	2.06046	3.438	5.49846
ETL 10-02	44-45 cm	1986.3	0.984908	1.1395	2.12441
ETL 10-02	46-47 cm	1985.95	1.18277	0.862	2.04477
ETL 10-02	48-49 cm	1985.58	0.60954	0.6512	1.26074
ETL 10-02	50-51 cm	1985.2	1.05312	1.2691	2.32222
ETL 10-02	52-53 cm	1984.82	0.366664	0.36212	0.728784
ETL 10-02	54-55 cm	1984.43	0.0833	0.0296	0.1129
ETL 10-02	56-57 cm	1982	0.0029	0.0093	0.0122
ETL 10-02	58-59 cm	1982	0.0018	0.0094	0.0112
ETL 10-02	60-61 cm	1982	0.025548	0.02143	0.046978
ETL 10-02	62-63 cm	1982	0.0029	0.01642	0.01932
ETL 10-02	64-65 cm	1981.6	0.334956	0.29585	0.630806
ETL 10-02	66-67 cm	1981.2	0.4046	0.044	0.4486
ETL 10-02	68-69 cm	1980.79	0.1149	0.0199	0.1348
ETL 10-02	70-71 cm	1980.39	0.1073	0.0167	0.124
ETL 10-02	72-73 cm	1980	0.0023	0	0.0023
ETL 10-02	74-75 cm	1979.64	0	0	0
MTE 08-03	0-1 cm	2007.97	1.04206	0.73319	1.77525
MTE 08-03	2-3 cm	2006.29	0.52866	0.7082	1.23686
MTE 08-03	4-5 cm	2004.59	0.542721	0.5757	1.11842
MTE 08-03	6-7 cm	2002.87	0.66028	0.6228	1.28308
MTE 08-03	8-9 cm	2001.17	0.71045	0.9092	1.61965
MTE 08-03	10-11 cm	1999.38	0.74029	0.8799	1.62019
MTE 08-03	12-13 cm	1997.57	0.79231	1.0829	1.87521
MTE 08-03	14-15 cm	1995.75	0.8013	1.0885	1.8898
MTE 08-03	16-17 cm	1993.85	0.85752	1.1549	2.01242
MTE 08-03	18-19 cm	1991.84	0.90821	1.6017	2.50991
MTE 08-03	20-21 cm	1989.92	0.97925	1.382	2.36125
MTE 08-03	21-22 cm	1989.35	0.92493	1.1627	2.08763
MTE 08-03	24-25 cm	1987.45	1.09136	2.0735	3.16486
MTE 08-03	26-27 cm	1986.06	1.31874	2.8535	4.17224
MTE 08-03	28-29 cm	1985.15	1.4316	3.981	5.4126
MTE 08-03	30-31 cm	1984.16	1.63749	2.8944	4.53189
MTE 08-03	32-33 cm	1983.22	1.66754	3.2406	4.90814
MTE 08-03	34-35 cm	1982.34	1.619	6.368	7.987
MTE 08-03	36-37 cm	1981.31	1.8999	13.274	15.1739
MTE 08-03	38-39 cm	1980.38	1.58859	2.8387	4.42729
MTE 08-03	40-41 cm	1979.43	1.7941	4.3896	6.1837
MTE 08-03	42-43 cm	1978.34	1.8804	4.5347	6.4151
MTE 08-03	44-45 cm	1977.26	3.41772	5.4657	8.88342
MTE 08-03	46-47 cm	1976.13	2.2429	6.405	8.6479
MTE 08-03	48-49 cm	1974.96	2.37752	4.1179	6.49542
MTE 08-03	50-51 cm	1973.82	2.01243	3.0252	5.03763
MTE 08-03	52-53 cm	1972.73	1.79595	2.4799	4.27585
MTE 08-03	54-55 cm	1971.65	2.28984	2.7821	5.07194
MTE 08-03	56-57 cm	1970.52	2.15017	3.1122	5.26237
MTE 08-03	58-59 cm	1969.33	2.09761	2.4582	4.55581
MTE 08-03	60-61 cm	1968.12	1.93064	2.5343	4.46494
MTE 08-03	62-63 cm	1966.92	2.44587	3.4627	5.90857
MTE 08-03	64-65 cm	1965.72	1.78224	2.3155	4.09774
MTE 08-03	66-67 cm	1964.57	1.91127	3.3588	5.27007
MTE 08-03	68-69 cm	1963.44	1.38377	1.4896	2.87337
CPX 08-01	0-1 cm	2008.2	0.941452	0.65516	1.59661
CPX 08-01	2-3 cm	2007.43	1.33606	0.6989	2.03496
CPX 08-01	4-5 cm	2006.65	1.55735	0.8795	2.43685
CPX 08-01	6-7 cm	2005.88	1.42862	0.8297	2.25832
CPX 08-01	8-9 cm	2005.1	1.41804	0.9014	2.31944
CPX 08-01	10-11 cm	2004.27	1.96891	0.9669	2.93581
CPX 08-01	12-13 cm	2003.3	1.42028	0.6028	2.02308
CPX 08-01	14-15 cm	2002.34	1.13225	0.6817	1.81395
CPX 08-01	16-17 cm	2001.37	0.659257	0.6498	1.30906
CPX 08-01	18-19 cm	2000.4	1.10406	1.0159	2.11996
CPX 08-01	20-21 cm	2000.31	1.00096	0.7811	1.78206
CPX 08-01	22-23 cm	1999.88	0.77565	0.7341	1.50975
CPX 08-01	24-25 cm	1999.45	0.91845	0.9492	1.86765
CPX 08-01	26-27 cm	1999.02	1.23663	0.8454	2.08203
CPX 08-01	28-29 cm	1998.59	1.12412	1.0529	2.17702
CPX 08-01	30-31 cm	1998.16	1.19525	0.9834	2.17865
CPX 08-01	32-33 cm	1997.73	1.34631	1.0844	2.43071
CPX 08-01	34-35 cm	1997.3	1.47046	1.3314	2.80186
CPX 08-01	36-37 cm	1996.88	1.34094	1.3576	2.69854
CPX 08-01	38-39 cm	1996.69	1.51949	1.5927	3.11219
CPX 08-01	40-41 cm	1996.5	0.9777	1.1491	2.1268
CPX 08-01	42-43 cm	1996.31	1.18428	1.3402	2.52448
CPX 08-01	44-45 cm	1996.08	1.10882	1.4579	2.56672
CPX 08-01	46-47 cm	1995.69	1.64419	1.8238	3.46799
CPX 08-01	48-49 cm	1995.3	1.27071	1.2948	2.56551
CPX 08-01	50-51 cm	1994.91	1.82066	1.784	3.60466
CPX 08-01	52-53 cm	1994.53	2.03928	2.4205	4.45978
CPX 08-01	54-55 cm	1994.14	2.06451	2.2806	4.34511
CPX 08-01	57-58 cm	1993.56	0.80689	0.5344	1.34129
CPX 08-01	59-60 cm	1993.23	1.78311	2.0996	3.88271
CPX 08-01	60-61 cm	1993.04	3.42649	2.9134	6.33989
CPX 08-01	62-63 cm	1992.65	2.33918	3.057	5.39618
CPX 08-01	64-65 cm	1992.27	2.50848	2.6492	5.15768
CPX 08-01	66-67 cm	1991.88	2.38455	2.807	5.19155
CPX 08-01	68-69 cm	1991.5	2.62395	2.9672	5.59115
CPX 08-01	70-71 cm	1991.11	1.75752	2.0437	3.80122
CPX 08-01	72-73 cm	1990.73	0.69719	0.8729	1.57009
CPX 08-01	74-75 cm	1990.34	1.59479	3.506	5.10079
CPX 08-01	76-77 cm	1989.96	1.7242	2.993	4.7172
TBR 09-01	0-1 cm	2009.87	1.62869	0.632	2.26069
TBR 09-01	3-4 cm	2009.64	1.67454	1.1542	2.82874
TBR 09-01	6-7 cm	2009.37	1.23825	0.9861	2.22435
TBR 09-01	9-10 cm	2009.05	1.23488	1.0122	2.24708
TBR 09-01	12-13 cm	2008.71	1.24153	0.8522	2.09373
TBR 09-01	15-16 cm	2008.38	1.45042	0.9397	2.39012
TBR 09-01	18-19 cm	2008.01	1.76114	1.0452	2.80634
TBR 09-01	21-22 cm	2007.65	2.12697	0.9499	3.07687
TBR 09-01	24-25 cm	2007.28	2.05798	0.9255	2.98348
TBR 09-01	27-28 cm	2006.94	1.78904	1.2584	3.04744
TBR 09-01	30-31 cm	2006.58	1.55579	1.0558	2.61159
TBR 09-01	33-34 cm	2006.21	1.67005	1.1385	2.80855
TBR 09-01	36-37 cm	2005.87	1.76642	1.2634	3.02982
TBR 09-01	39-40 cm	2005.52	1.41869	0.9204	2.33909
TBR 09-01	42-43 cm	2005.16	2.63331	1.8209	4.45421
TBR 09-01	45-46 cm	2004.85	1.28995	0.8466	2.13655
TBR 09-01	48-49 cm	2004.52	1.98189	1.2369	3.21879
TBR 09-01	51-52 cm	2004.2	1.95272	1.305	3.25772
TBR 09-01	54-55 cm	2003.85	1.73531	1.1639	2.89921
TBR 09-01	57-58 cm	2003.47	2.32442	1.4651	3.78952
TBR 09-01	60-61 cm	2003.12	1.44994	1.4075	2.85744
TBR 09-01	63-64 cm	2002.95	0.80576	0.5634	1.36916
TBR 09-01	66-67 cm	2002.48	2.06073	1.7547	3.81543
TBR 09-01	69-70 cm	2001.71	1.81995	1.3168	3.13675
TBR 09-01	72-73 cm	2001.32	0.473185	0.2659	0.739085
TBR 09-01	75-76 cm	2001.32	1.20107	0.46439	1.66546
TBR 09-01	78-79 cm	2000.79	2.08981	1.8106	3.90041
TBR 09-01	81-82 cm	2000.21	1.90496	1.9178	3.82276
TBR 09-01	84-85 cm	1999.65	2.44986	2.1962	4.64606
TBR 09-01	87-88 cm	1998.86	2.32677	2.078	4.40477
TBR 09-01	90-91 cm	1998.02	2.29461	2.1358	4.43041
TBR 09-01	93-94 cm	1997.14	2.46349	2.642	5.10549
TBR 09-01	96-97 cm	1996.15	2.96246	2.4819	5.44436
TBR 09-01	99-100 cm	1995.2	3.20921	2.9032	6.11241
TBR 09-01	102-103 cm	1994.23	2.40099	1.9911	4.39209
TBR 09-01	105-106 cm	1993.85	1.23567	0.8801	2.11577
TBR 09-01	108-109 cm	1993.51	4.13314	2.6345	6.76764
TBR 09-01	111-112 cm	1993.21	2.75401	2.2044	4.95841
TBR 09-01	114-115 cm	1992.97	0.74965	0.6269	1.37655
TBR 09-01	117-118 cm	1992.8	1.638	1.8225	3.4605
TBR 09-01	120-121 cm	1992.46	11.6891	3.8966	15.5857
BRE 08-01	0-1 cm	2008.5	1.26278	0.6408	1.90358
BRE 08-01	4-5 cm	2007.28	1.35456	0.8336	2.18816
BRE 08-01	8-9 cm	2006.06	1.0464	0.736	1.7824
BRE 08-01	12-13 cm	2004.84	1.33704	0.687	2.02404
BRE 08-01	16-17 cm	2003.61	1.22727	0.9251	2.15237
BRE 08-01	20-21 cm	2002.3	1.39307	0.9459	2.33897
BRE 08-01	24-25 cm	2000.9	2.36169	1.9426	4.30429
BRE 08-01	28-29 cm	1999.5	1.47862	1.0345	2.51312
BRE 08-01	32-33 cm	1998.1	1.44064	1.1298	2.57044
BRE 08-01	36-37 cm	1996.7	1.9595	1.6582	3.6177
BRE 08-01	40-41 cm	1995.3	1.29233	0.316	1.60833
BRE 08-01	44-45 cm	1993.9	1.7292	1.4582	3.1874
BRE 08-01	48-49 cm	1992.5	1.37767	1.0759	2.45357
BRE 08-01	50-51 cm	1991.79	2.8982	2.768	5.6662
BRE 08-01	52-53 cm	1991.09	3.41782	2.5293	5.94712
BRE 08-01	55-56 cm	1990.04	2.25448	1.82	4.07448
BRE 08-01	56-57 cm	1989.34	4.60188	5.4044	10.0063
BRE 08-01	59-60 cm	1988.64	3.41218	3.1749	6.58708
BRE 08-01	60-61 cm	1987.77	3.1184	2.8626	5.981
BRE 08-01	64-65 cm	1986.89	5.4031	5.815	11.2181
BRE 08-01	68-69 cm	1985.96	1.45517	1.3386	2.79377
BRE 08-01	72-73 cm	1985.39	7.6201	6.629	14.2491
BRE 08-01	76-77 cm	1984.82	15.8292	13.236	29.0652
BRE 08-01	79-80 cm	1984.4	3.28727	3.5631	6.85037
BRE 08-01	83-84 cm	1983.29	15.3613	15.625	30.9863
BRE 08-01	88-89 cm	1979.76	10.1832	13.1883	23.3715
BRE 08-01	92-93 cm	1976.93	10.2374	13.9036	24.141
BRE 08-01	96-97 cm	1974.1	11.3428	15.9212	27.264
BRE 08-01	100-101 cm	1971.27	8.12389	10.0553	18.1792
BRE 08-01	104-105 cm	1968.44	24.9642	18.516	43.4802
ARS 10-02	0 - 2 cm	2010.08	1.36794	0.7759	2.14384
ARS 10-02	5 - 7 cm	2008.43	1.70251	1.3392	3.04171
ARS 10-02	10 - 12 cm	2006.93	1.70673	1.3849	3.09163
ARS 10-02	15 - 17 cm	2005.4	2.3565	2.0342	4.3907
ARS 10-02	20 - 22 cm	2003.95	1.72355	1.603	3.32655
ARS 10-02	25 - 27 cm	2003.24	1.82879	1.6879	3.51669
ARS 10-02	30 - 32 cm	2002.26	1.6286	1.5095	3.1381
ARS 10-02	35 - 37 cm	2001.3	2.00499	2.9678	4.97279
ARS 10-02	40 - 42 cm	2000.02	2.19118	2.0389	4.23008
ARS 10-02	45 - 47 cm	1998.96	3.04582	3.4977	6.54352
ARS 10-02	50 - 52 cm	1997.79	2.42282	2.2884	4.71122
ARS 10-02	55 - 57 cm	1996.56	3.1362	3.415	6.5512
ARS 10-02	60 - 62 cm	1995.21	2.46901	2.8148	5.28381
ARS 10-02	65 - 67 cm	1993.89	2.69958	2.7017	5.40128
ARS 10-02	70 - 72 cm	1992.57	3.6599	3.354	7.0139
ARS 10-02	75 - 77 cm	1991.37	4.0757	4.633	8.7087
ARS 10-02	80 - 82 cm	1990.15	3.2996	3.698	6.9976
ARS 10-02	85 - 87 cm	1988.96	4.3316	4.404	8.7356
ARS 10-02	90 - 92 cm	1987.64	4.6101	4.731	9.3411
ARS 10-02	95 - 97 cm	1986.3	7.5842	9.716	17.3002
ARS 10-02	100 - 102 cm	1985.04	6.5601	12.163	18.7231
ARS 10-02	105 - 107 cm	1983.77	5.481	12.792	18.273
ARS 10-02	110 - 112 cm	1982.51	4.7151	12.445	17.1601
ARS 10-02	115 - 117 cm	1981.19	9.9437	14.863	24.8067
ARS 10-02	120 - 122 cm	1979.79	10.5717	14.491	25.0627
ARS 10-02	125 - 127 cm	1978.49	8.419	12.791	21.21
ARS 10-02	130 - 132 cm	1977.2	12.5594	14.642	27.2014
GEC 11-04	0 - 2 cm	2011.18	4.1197	4.814	8.9337
GEC 11-04	4 - 6 cm	2010.26	21.6988	41.351	63.0498
GEC 11-04	8 - 10 cm	2009.13	6.8099	58.698	65.5079
GEC 11-04	12 - 14 cm	2008	4.3553	15.791	20.1463
GEC 11-04	16 - 18 cm	2006.77	51.2841	15.424	66.7081
GEC 11-04	20 - 22 cm	2005.63	4.8519	18.774	23.6259
GEC 11-04	24 - 26 cm	2004.52	5.5587	35.745	41.3037
GEC 11-04	28 - 30 cm	2003.6	2.9324	16.981	19.9134
GEC 11-04	32 - 34 cm	2002.94	6.2045	31.853	38.0575
GEC 11-04	36 - 38 cm	2002.31	4.8332	22.892	27.7252
GEC 11-04	40 - 42 cm	2001.82	6.5587	36.252	42.8107
GEC 11-04	44 - 46 cm	2001.29	13.5423	64.978	78.5203
GEC 11-04	48 - 50 cm	2000.18	15.1451	91.58	106.725
GEC 11-04	52 - 54 cm	1998.96	23.242	128.17	151.412
GEC 11-04	56 - 58 cm	1997.83	6.7214	58.209	64.9304
GEC 11-04	60 - 62 cm	1996.68	7.8222	40.881	48.7032
GEC 11-04	64 - 66 cm	1995.44	17.2522	74.76	92.0122
GEC 11-04	68 - 70 cm	1994.09	21.772	114.26	136.032
GEC 11-04	72 - 74 cm	1993.97	29.052	228.44	257.492
GEC 11-04	76 - 78 cm	1993.89	17.215	267.085	284.3
GEC 11-04	80 - 82 cm	1993.79	43.2545	208.655	251.91
GEC 11-04	84 - 86 cm	1991.76	22.593	242.144	264.737
GEC 11-04	88 - 90 cm	1990	14.7917	151.987	166.779
GEC 11-04	92 - 94 cm	1988.28	17.707	110.661	128.368
GEC 11-04	96 - 98 cm	1986.78	22.897	90.28	113.177

## Sheet: S-7 %change
Table S-7. Estimated concentrations in 1992 and 2010 in pg g-1 dry weight and percent change in concentrations.
Concentrations were estimated using regression equations used to evaluate t1/2 (Table 1).
	∑PCDDs			∑PCDFs			∑PCDD/Fs
Site	1992	2010	percent change	1992	2010	percent change	1992	2010	percent change
ETL	200	23.6	0.882	28.4	4.28	0.849296	232	27.9	0.879741
MTE	515	73.5	0.857282	45	10.8	0.76	563	84.4	0.850089
CPX	634	70.1	0.889432	57.1	18.1	0.683012	692	86.3	0.875289
TBL	557	204	0.633752	84.7	36	0.57497	643	240	0.62675
BRE	650	106	0.836923	95.2	20.3	0.786765	748	126	0.831551
ARS	1560	263	0.83141	180	44	0.755556	1740	306	0.824138
GEC	75200	3830	0.949069	4050	463	0.885679	78300	4360	0.944317
